# Supplementary material for: Computational design of phenazine derivative molecules as redox-active electrolyte materials in alkaline aqueous organic flow batteries
Source: Royal Society of Chemistry journal article supplement (doi:10.1039/d2nj01769e), 2022-01-01
Supplement: d2nj01769e1.pdf [file d2nj01769e1.pdf]

## Supporting Information

Computational design of phenazine derivative molecules as redox-active electrolyte materials in alkaline aqueous organic flow batteries

Wenfei Zhang,<sup>‡a</sup> Yanli Chen,<sup>‡\*a</sup> Tai-Rui Wu,<sup>b</sup> Xue Xia,<sup>a</sup> Juan Xu,<sup>a</sup> Zhidong Chen,<sup>a</sup>

Jianyu Cao<sup>\*a</sup> and De-Yin Wu<sup>b</sup>

*<sup>a</sup>Jiangsu Key Laboratory of Advanced Catalytic Materials and Technology, School of Petrochemical Engineering, Changzhou University, Changzhou 213164, China*

*<sup>b</sup>State Key Laboratory of Physical Chemistry of Solid Surface, and Department of Chemistry, College of Chemistry and Chemical Engineering, Xiamen University, Xiamen, 361005, China*

<sup>‡</sup> W. Zhang and Y. Chen contributed equally.

\*Corresponding author,

Tel. & Fax: +86-0519-86330239

E-mail: jycao@cczu.edu.cn (J. Cao); chenyl@cczu.edu.cn (Y. Chen)

**Table S1** The total change of Gibbs free energy ( $\Delta G^*_{\text{sol}}$ ), computed standard potentials ( $E^0_{\text{cal}}$ ) and measured standard potentials ( $E^0_{\text{exp}}$  vs. SHE, V) of various phenazine derivatives in alkaline aqueous solution. Phenazine (PZ), 1-hydroxyphenazine (1-HPZ), 2-hydroxyphenazine (2-HPZ), 1-phenazinecarboxylic acid (PZ-1-C), phenazine-1-carboxamide (PZ-1-CA), 2,3-dihydroxyphenazine (2,3-DHPZ), 2-hydroxy-3-aminophenazine (2,3-HAPZ), 2,3-diaminophenazine (2,3-DAPZ), 1,4-phenazinedicarboxylic acid (PZ-1,4-DC), 1,5-phenazinedicarboxylic acid (PZ-1,5-DC), 7,8-dihydroxy-2-phenazinesulfonic acid (7,8-DHPZ-2-S), 7,8-dihydroxy-2-phenazinecarboxylic acid (7,8-DHPZ-2-C), benzo[a]hydroxyphenazine-7-carboxylic acid (BHPC), 1,2:3,4-dibenzophenazine (DBPZ), dibenzo[a,c]phenazin-11-amine (DBPZ-11-A), dipyridophenazine (DPPZ), 1-nitrophenazine (1-NPZ), 2-nitrophenazine (2-NPZ), 2,3-dinitrophenazine (2,3-DNPZ).

| No. | Compound     | $\Delta G^*_{\text{sol}}$ (kJ mol <sup>-1</sup> ) | $E^0_{\text{cal}}$ (V) | $E^0_{\text{exp}}$ (V) |
|-----|--------------|---------------------------------------------------|------------------------|------------------------|
| P1  | PZ           | -932.82                                           | -0.426                 | -0.36 <sup>[S1]</sup>  |
| P2  | 1-HPZ        | -899.24                                           | -0.600                 | -0.594 <sup>[S2]</sup> |
| P3  | 2-HPZ        | -894.03                                           | -0.627                 | -0.67 <sup>[S3]</sup>  |
| P4  | PZ-1-C       | -906.96                                           | -0.560                 | -0.536 <sup>[S2]</sup> |
| P5  | PZ-1-CA      | -907.35                                           | -0.558                 | -0.56 <sup>[S2]</sup>  |
| P6  | 2,3-DHPZ     | -875.70                                           | -0.722                 | -0.82 <sup>[S1]</sup>  |
| P7  | 2,3-HAPZ     | -885.54                                           | -0.671                 | -0.78 <sup>[S3]</sup>  |
| P8  | 2,3-DAPZ     | -867.02                                           | -0.767                 | -0.701 <sup>[S2]</sup> |
| P9  | PZ-1,4-DC    | -991.87                                           | -0.120                 | -0.04 <sup>[S4]</sup>  |
| P10 | PZ-1,5-DC    | -972.96                                           | -0.218                 | -0.165 <sup>[S4]</sup> |
| P11 | 7,8-DHPZ-2-S | -865.67                                           | -0.774                 | -0.86 <sup>[S1]</sup>  |
| P12 | 7,8-DHPZ-2-C | -876.28                                           | -0.719                 | -0.88 <sup>[S1]</sup>  |
| P13 | BHPC         | -886.70                                           | -0.665                 | -0.78 <sup>[S3]</sup>  |
| P14 | DBPZ         | -862.58                                           | -0.790                 | -0.778                 |
| P15 | DBPZ-11-A    | -852.35                                           | -0.843                 | -0.825                 |
| P16 | DPPZ         | -866.44                                           | -0.770                 | -0.732                 |
| P17 | 1-NPZ        | -941.31                                           | -0.382                 | -0.45 <sup>[S5]</sup>  |
| P18 | 2-NPZ        | -928.96                                           | -0.446                 | -0.39 <sup>[S5]</sup>  |
| P19 | 2,3-DNPZ     | -958.29                                           | -0.294                 | -0.20 <sup>[S5]</sup>  |

**Table S2** Comparison between the computed solvation free energy ( $\Delta G_{\text{solv}}$ ) and measured solubility (S) of various organic molecules in water. Alloxazine 7/8-carboxylic acid (ACA), 3,3'-(phenazine-1,6-diylbis(azanediy))diacetic acid (1,6-DGAP), 3,3'-(phenazine-1,8-diylbis(azanediy))diacetic acid (1,8-DGAP), 3,3'-(phenazine-2,7-diylbis(azanediy))diacetic acid (2,7-DGAP), 3,3'-(phenazine-1,6-diylbis(azanediy))dibutyric acid (1,6-DBAP), 6-(1H-pyrrol-1-yl) quinoxaline (6-PyQX), 7-bromo-2,3-phenazinediol (7-Br-DHPZ), 4-carboxy-TEMPO (4CaT), 4-cyano-TEMPO (4CyT), 2,5-dihydroxy-1,4-benzoquinone (DHBQ), 1,8-dihydroxyanthraquinone (1,8-DHAQ).

| Compound     | $\Delta G_{\text{solv}}$ (kJ mol <sup>-1</sup> ) | S (mol L <sup>-1</sup> )   |
|--------------|--------------------------------------------------|----------------------------|
| PZ           | 12.0                                             | $6.85 \times 10^{-5}$ [S1] |
| 2-HPZ        | -44.0                                            | 1.7[S3]                    |
| PCA          | -40.1                                            | $0.27 \times 10^{-3}$ [S6] |
| 2,3-DHPZ     | -43.0                                            | 0.1[S1]                    |
| 2,3-HAPZ     | -44.3                                            | 0.43[S3]                   |
| 7,8-DHPZ-2-S | -70.7                                            | 1.8[S1]                    |
| 7,8-DHPZ-2-C | -77.0                                            | 0.95[S1]                   |
| BHPC         | -51.1                                            | 1.55[S3]                   |
| ACA          | -75.5                                            | 2[S7]                      |
| 1,6-DGAP     | -42.0                                            | 0.115[S8]                  |
| 1,8-DGAP     | -58.8                                            | 0.924[S8]                  |
| 2,7-DGAP     | -67.4                                            | 0.886[S8]                  |
| 1,6-DBAP     | -55.7                                            | 0.401[S8]                  |
| 6-PyQX       | -2.50                                            | $6.6 \times 10^{-4}$       |
| 7-Br-DHPZ    | 0.30                                             | $7.86 \times 10^{-4}$      |
| 4CaT         | -29.0                                            | 0.021[S9]                  |
| 4CyT         | -18.0                                            | 0.026[S9]                  |
| DHBQ         | -62.9                                            | 4.31[S10]                  |
| 1,8-DHAQ     | -50.0                                            | 0.08[S11]                  |

The solubilities for 6-PyQX and 7-Br-DHPZ in water are obtained from solubility experiments. The experimental procedure is described as follows. The excess 6-PyQX (or 7-Br-DHPZ) was first equilibrated in water for 48 hours at room temperature. After filtering the mixture through a 0.5  $\mu\text{m}$  syringe-tip filter (Millipore, type FH), a saturated aqueous solution (200 mL) was obtained. Then, this aqueous solution was extracted using chloroform (50 mL). The obtained chloroform solution was concentrated by a known amount (5 mL) and the concentration was evaluated by UV-Vis (Shimadzu UV

mini 1240) spectrophotometer. The concentration was calculated according to a pre-calibrated absorbance-concentration curve of known concentrations of 6-PyQX (or 7-Br-DHPZ) in chloroform.

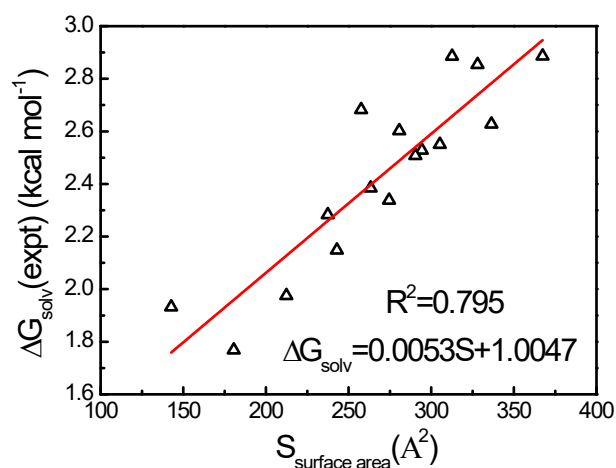

**Fig. S1** Dependence of experimental vacuum to water solvation free energies on calculated solvent-accessible surface area (SASA) for various hydrocarbons.

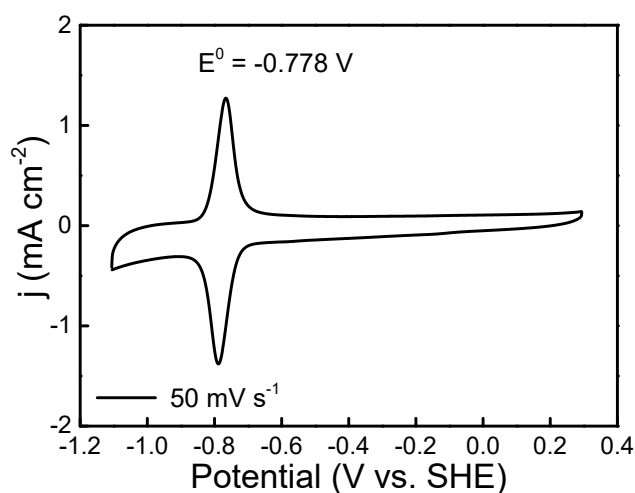

**Fig. S2** The CV curve of 1,2:3,4-dibenzophenazine (DBPZ, P14) electrode in a 1 M KOH solution at 50 mV s<sup>-1</sup>. The standard potential is calculated to be -0.778 V.

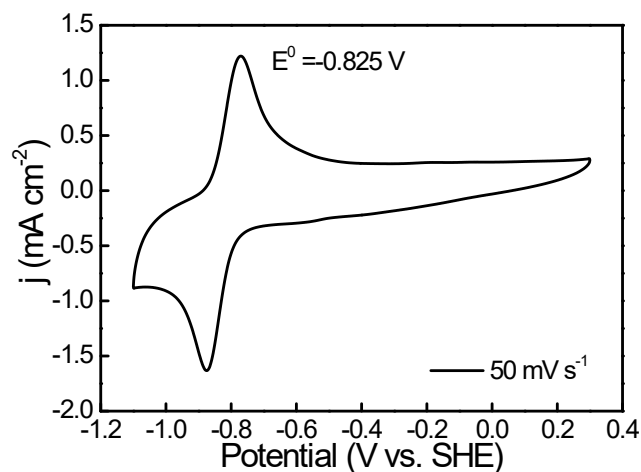

**Fig. S3** The CV curve of dibenzo[*a,c*]phenazin-11-amine (DBPZ-11-A, P15) electrode in a 1 M KOH solution at 50 mV s<sup>-1</sup>. The standard potential is calculated to be -0.825 V.

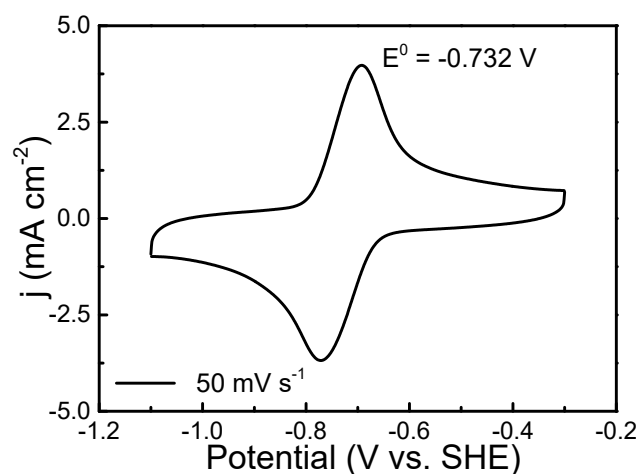

**Fig. S4** The CV curve of dipyridophenazine (DPPZ, P16) electrode in a 1 M KOH solution at 50 mV s<sup>-1</sup>. The standard potential is calculated to be -0.732 V.

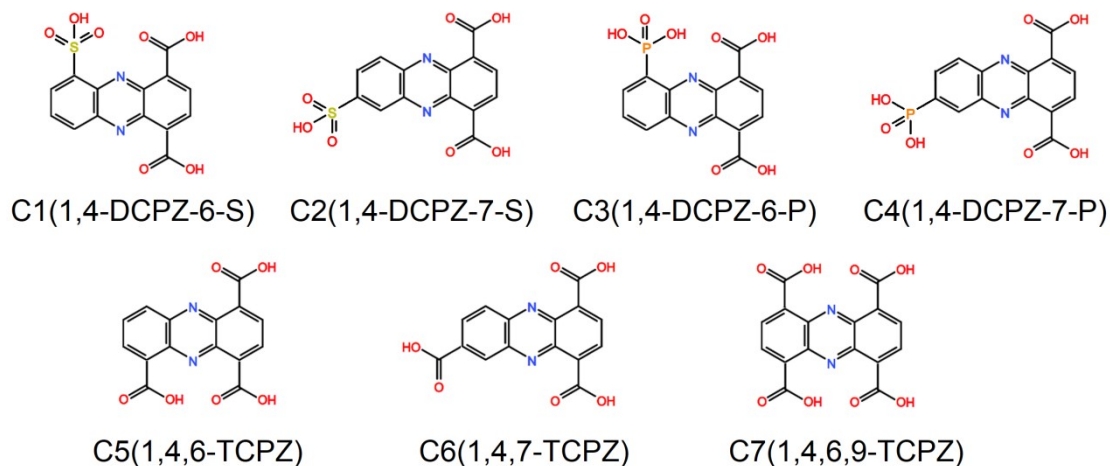

**Fig. S5** Proposed phenazine derivative molecules as catholytes.

**Table S3** The calculated standard potentials ( $E_{\text{cal}}^0$ ) and solvation free energy ( $\Delta G_{\text{solv}}$ ) in water for different DHPZ substitution patterns. 7,8-Dihydroxy-1-phenazinesulfonic acid (7,8-DHPZ-1-S), 7,8-dihydroxy-1-phenazinephosphonic acid (7,8-DHPZ-1-P), 7,8-dihydroxy-2-phenazinephosphonic acid (7,8-DHPZ-2-P), 7,8-dihydroxy-1-phenazinecarboxylic acid (7,8-DHPZ-1-C), 4,7,8-trihydroxy-2-phenazinesulfonic acid (4,7,8-THPZ-2-S), 4,7,8-trihydroxy-2-phenazinephosphonic acid (4,7,8-THPZ-2-P), 4,7,8-trihydroxy-2-phenazinecarboxylic acid (4,7,8-THPZ-2-C), 3,7,8-trihydroxy-2-phenazinesulfonic acid (3,7,8-THPZ-2-S), 3,7,8-trihydroxy-2-phenazinephosphonic acid (3,7,8-THPZ-2-P), 3,7,8-trihydroxy-2-phenazinecarboxylic acid (3,7,8-THPZ-2-C), 1,7,8-trihydroxy-2-phenazinesulfonic acid (1,7,8-THPZ-2-S), 1,7,8-trihydroxy-2-phenazinephosphonic acid (1,7,8-THPZ-2-P), 1,7,8-trihydroxy-2-phenazinecarboxylic acid (1,7,8-THPZ-2-C).

| No. | Compound       | $E_{\text{cal}}^0$ (V) | $\Delta G_{\text{solv}}$ (kJ mol <sup>-1</sup> ) |
|-----|----------------|------------------------|--------------------------------------------------|
| A1  | 7,8-DHPZ-1-S   | -0.626                 | -135.0                                           |
| A2  | 7,8-DHPZ-1-P   | -0.714                 | -152.9                                           |
| A3  | 7,8-DHPZ-2-P   | -0.655                 | -155.9                                           |
| A4  | 7,8-DHPZ-1-C   | -0.521                 | -117.3                                           |
| A5  | 4,7,8-THPZ-2-S | -0.774                 | -138.9                                           |
| A6  | 4,7,8-THPZ-2-P | -0.787                 | -163.5                                           |
| A7  | 4,7,8-THPZ-2-C | -0.729                 | -121.2                                           |
| A8  | 3,7,8-THPZ-2-S | -0.572                 | -134.0                                           |
| A9  | 3,7,8-THPZ-2-P | -0.643                 | -157.5                                           |
| A10 | 3,7,8-THPZ-2-C | -0.589                 | -123.1                                           |
| A11 | 1,7,8-THPZ-2-S | -0.707                 | -136.0                                           |
| A12 | 1,7,8-THPZ-2-P | -0.767                 | -153.6                                           |
| A13 | 1,7,8-THPZ-2-C | -0.781                 | -125.5                                           |

**Table S4** The calculated standard potentials ( $E_{\text{cal}}^0$ ) and solvation free energy ( $\Delta G_{\text{solv}}$ ) in water for different DCPZ substitution patterns. 6-Sulfo-phenazine-1,4-dicarboxylic

acid (1,4-DCPZ-6-S), 7-Sulfo-phenazine-1,4-dicarboxylic acid (1,4-DCPZ-7-S), 6-phospho-phenazine-1,4-dicarboxylic acid (1,4-DCPZ-6-P), 7-phospho-phenazine-1,4-dicarboxylic acid (1,4-DCPZ-7-P), phenazine-1,4,6-tricarboxylic acid (1,4,6-TCPZ), phenazine-1,4,7-tricarboxylic acid (1,4,7-TCPZ), phenazine-1,4,6,9-tetracarboxylic acid (1,4,6,9-TCPZ).

| No. | Compound     | $E^0_{cal}$ (V) | $\Delta G_{solv}$ (kJ mol <sup>-1</sup> ) |
|-----|--------------|-----------------|-------------------------------------------|
| C1  | 1,4-DCPZ-6-S | -0.304          | -168.0                                    |
| C2  | 1,4-DCPZ-7-S | -0.274          | -160.9                                    |
| C3  | 1,4-DCPZ-6-P | -0.389          | -183.5                                    |
| C4  | 1,4-DCPZ-7-P | -0.234          | -175.3                                    |
| C5  | 1,4,6-TCPZ   | -0.123          | -143.0                                    |
| C6  | 1,4,7-TCPZ   | -0.216          | -137.7                                    |
| C7  | 1,4,6,9-TCPZ | +0.086          | -171.7                                    |

## References

[S1] A. Hollas,, X. Wei, V. Murugesan, Z. Nie, B. Li, D. Reed, J. Liu, V. Sprenkle and W. Wang, A biomimetic high-capacity phenazine-based anolyte for aqueous organic redox flow batteries, Nat. Energy, 2018, 3, 508-514.

[S2] J.-J. Chen, W. Chen, H. He, D.-B. Li, W.-W. Li, L. Xiong and H.-Q. Yu, Manipulation of microbial extracellular electron transfer by changing molecular structure of phenazine-type redox mediators, Environ. Sci. Technol. 2013, 47, 1033-1039.

[S3] C. Wang, X. Li, B. Yu, Y. Wang, Z. Yang, H. Wang, H. Lin, J. Ma, G. Li, Z. Jin, Molecular design of fused-ring phenazine derivatives for long-cycling alkaline redox flow batteries, ACS Energy Lett. 2020, 5, 411-417.

[S4] L. Miao, L. Liu, K. Zhang, J. Chen, Molecular design strategy for high-redox-potential and poorly soluble n-type phenazine derivatives as cathode materials for lithium batteries, ChemSusChem 2020, 13, 2337-2344.

[S5] C. de la Cruz, A. Molina, N. Patil, E. Ventosa, R. Marcilla and A. Mavrandonakis,

New insights into phenazine-based organic redox flow batteries by using high-throughput DFT modeling, *Sustain. Energy Fuels* 2020, 4, 5513-5521.

[S6] Z.-J. Yang, H.-B. Hu, X.-H. Zhang and Y.-Q. Xu, Solubility of phenazine-1-carboxylic acid in water, methanol, and ethanol from (278.2 to 328.2) K, *J. Chem. Eng. Data* 2007, 52, 184-185.

[S7] K. Lin, R. Gómez-Bombarelli, E.S. Beh, L. Tong, Q. Chen, A. Valle, A. Aspuru-Guzik, M.J. Aziz and R.G. Gordon, A redox-flow battery with an alloxazine-based organic electrolyte, *Nat. Energy*, 2016, 1, 1-8.

[S8] S. Pang, X. Wang, P. Wang and Y. Ji, Biomimetic amino acid functionalized phenazine flow batteries with long lifetime at near-neutral pH, *Angew. Chem. Int. Ed.*, 2020, 1, 5289-5298.

[S9] W. Zhou, W. Liu, M. Qin, Z. Chen, J. Xu, J. Cao and J. Li, Fundamental properties of TEMPO-based catholytes for aqueous redox flow batteries: effects of substituent groups and electrolytes on electrochemical properties, solubilities and battery performance, *RSC Adv.*, 2020, 10, 21839-21844.

[S10] Z. Yang, L. Tong, D.P. Tabor, E.S. Beh, M.-A. Goulet, D. De Porcellinis, A. Aspuru-Guzik, R.G. Gordon and M.J. Aziz, Alkaline benzoquinone aqueous flow battery for large-scale storage of electrical energy, *Adv. Energy Mater.*, 2018, 8, 1-9.

[S11] J. Cao, M. Tao, H. Chen, J. Xu and Z. Chen, A highly reversible anthraquinone-based anolyte for alkaline aqueous redox flow batteries, *J. Power Sources*, 2018, 386, 40-46.
